# Supplementary material for: Local Genomic Instability of the SpTransformer Gene Family in the Purple Sea Urchin Inferred from BAC Insert Deletions
Source: MDPI journal article supplement (doi:10.3390/genes15020222), 2024-02-09
Supplement: s1 [file s1]

**Local genomic instability of the SpTransformer gene family in the purple sea urchin inferred from BAC insert deletions**

Megan A. Barela Hudgell, Farhana Momtaz, Abiha Jafri, Max A. Alekseyev, L. Courtney Smith

**Methods**

The sequence reads for each BAC insert were assembled into contigs as described in the main paper. The consensus sequences were aligned by hand in Molecular Evolutionary Genetics Analysis X (MEGAX) against the original BAC insert sequences (GenBank Accession numbers KU668451 [BAC-51], KU668452 [BAC-52]) (1). The alignments shown below were generated in BioEdit (version 5.0.9), formatted and exported as rtf files, and imported into this document.

**BAC insert sequence alignments**

**Alignment 1.** BAC-51 and BAC-51-15 identify the locations of three deletions in BAC-51-15

**Page**  
1

Deletion 1; 96,854 bp

Deletion 2; 2,270 bp\*

\* likely represents an assembly artifact

**Alignment 2.** BAC-52 and BAC-52-2b identify the locations of one deletion in BAC-52-2b

9

Deletion 1; 108,397 bp

**Alignment 1. BAC-51 and BAC-51-15**

|           |                                                                                                       |       |       |       |       |       |       |       |       |       |  |
|-----------|-------------------------------------------------------------------------------------------------------|-------|-------|-------|-------|-------|-------|-------|-------|-------|--|
|           | 18910                                                                                                 | 18920 | 18930 | 18940 | 18950 | 18960 | 18970 | 18980 | 18990 | 19000 |  |
| BAC-51    | ..... ..... ..... ..... ..... ..... ..... ..... ..... ..... .....                                     |       |       |       |       |       |       |       |       |       |  |
| BAC-51-15 | TCATTCAACATACCGTAAATAGCTTCATCATGTTCTTTTCAGAAGATTTTAATTTAAAATATTTATTGTGGTTGGGGTATGTTTCTCCAACTGCAAATG   |       |       |       |       |       |       |       |       |       |  |
|           | 19010                                                                                                 | 19020 | 19030 | 19040 | 19050 | 19060 | 19070 | 19080 | 19090 | 19100 |  |
| BAC-51    | ..... ..... ..... ..... ..... ..... ..... ..... ..... ..... .....                                     |       |       |       |       |       |       |       |       |       |  |
| BAC-51-15 | ATGTGCATTATATTTTATAAGGTTTCATTTTAAATAAGAACTGTAATAACCTAGTATTTTTGATCAAATATGTTGCTCAGAAGTCTTGAACAGCATTAAAT |       |       |       |       |       |       |       |       |       |  |

|           |                                                                                                        |       |       |       |       |       |       |       |       |       |  |
|-----------|--------------------------------------------------------------------------------------------------------|-------|-------|-------|-------|-------|-------|-------|-------|-------|--|
|           | 19110                                                                                                  | 19120 | 19130 | 19140 | 19150 | 19160 | 19170 | 19180 | 19190 | 19200 |  |
| BAC-51    | .... .... .... .... .... .... .... .... .... .... .... .... .... .... ....                             |       |       |       |       |       |       |       |       |       |  |
| BAC-51-15 | ACACGACTTAACTACAGACCCGTGATTGAATTCATTTTCAGTCAGCATTGTTGCATAAATTCATTTATTTATGACTTATTTGACTTCTGCATTAAACAG    |       |       |       |       |       |       |       |       |       |  |
|           | 19210                                                                                                  | 19220 | 19230 | 19240 | 19250 | 19260 | 19270 | 19280 | 19290 | 19300 |  |
| BAC-51    | .... .... .... .... .... .... .... .... .... .... .... .... .... .... ....                             |       |       |       |       |       |       |       |       |       |  |
| BAC-51-15 | CTTGACAACCTGTTTCAGAGGCACCCCATCGGAAGTGACTTTGTGGGACTAGAGATCACCAGCAGTCGCTTTGATACTAATAGTAACCTACGTGATTGGCT  |       |       |       |       |       |       |       |       |       |  |
|           | 19310                                                                                                  | 19320 | 19330 | 19340 | 19350 | 19360 | 19370 | 19380 | 19390 | 19400 |  |
| BAC-51    | .... .... .... .... .... .... .... .... .... .... .... .... .... .... ....                             |       |       |       |       |       |       |       |       |       |  |
| BAC-51-15 | ACTCCATCTACCTGTGTGCTACCTCCCACTACAATGAGGAGAGCATCAAGGATACCTTCAATAGCGCCCTCACAGGGGCTAACATGGACACCTTTGCCGC   |       |       |       |       |       |       |       |       |       |  |
|           | 19410                                                                                                  | 19420 | 19430 | 19440 | 19450 | 19460 | 19470 | 19480 | 19490 | 19500 |  |
| BAC-51    | .... .... .... .... .... .... .... .... .... .... .... .... .... .... ....                             |       |       |       |       |       |       |       |       |       |  |
| BAC-51-15 | TTCAAATGTCATTGTGACTGATTCACTTGACTTCAGTAAGTCACTCTACCGAGTTCCAGTTTTTTTAAGGGCAGCAAACATAGACTATCTGTCTAATATT   |       |       |       |       |       |       |       |       |       |  |
|           | 19510                                                                                                  | 19520 | 19530 | 19540 | 19550 | 19560 | 19570 | 19580 | 19590 | 19600 |  |
| BAC-51    | .... .... .... .... .... .... .... .... .... .... .... .... .... .... ....                             |       |       |       |       |       |       |       |       |       |  |
| BAC-51-15 | TTATTGTAATCACTCCATGGCAGTGTTTCGCAAAGACTAAGATCGACTTTATGTTGGACTTAACTATGGCAGGCCATTTCATGCCACTGTTTGCTCTCACC  |       |       |       |       |       |       |       |       |       |  |
|           | 19610                                                                                                  | 19620 | 19630 | 19640 | 19650 | 19660 | 19670 | 19680 | 19690 | 19700 |  |
| BAC-51    | .... .... .... .... .... .... .... .... .... .... .... .... .... .... ....                             |       |       |       |       |       |       |       |       |       |  |
| BAC-51-15 | ATTTACTGGCATTGGTCTCTCAAGGGACGTACAAATCATGGTCACAAATCTACAGATTTTACATTTTGGATAATTCATTATTGAAGGAAAAATATTATC    |       |       |       |       |       |       |       |       |       |  |
|           | 19710                                                                                                  | 19720 | 19730 | 19740 | 19750 | 19760 | 19770 | 19780 | 19790 | 19800 |  |
| BAC-51    | .... .... .... .... .... .... .... .... .... .... .... .... .... .... ....                             |       |       |       |       |       |       |       |       |       |  |
| BAC-51-15 | TAAAGATCATAATGGTGAGAGCAAATAGTGGCATGAACGGCCTGCCATAGTTAAGTCCAACCTAAAGTTGGACTTTCCTCTCTCTCACATGGTGCACCTCG  |       |       |       |       |       |       |       |       |       |  |
|           | 19810                                                                                                  | 19820 | 19830 | 19840 | 19850 | 19860 | 19870 | 19880 | 19890 | 19900 |  |
| BAC-51    | .... .... .... .... .... .... .... .... .... .... .... .... .... .... ....                             |       |       |       |       |       |       |       |       |       |  |
| BAC-51-15 | CAAGCCTACTGTATAAACTTAAAGTTTATCTTACTCTATGTGAAACACTGCCATGTGCATATTATAATTTGCCTTGTTTGTGGTGTTCAAATAAACACA    |       |       |       |       |       |       |       |       |       |  |
|           | 19910                                                                                                  | 19920 | 19930 | 19940 | 19950 | 19960 | 19970 | 19980 | 19990 | 20000 |  |
| BAC-51    | .... .... .... .... .... .... .... .... .... .... .... .... .... .... ....                             |       |       |       |       |       |       |       |       |       |  |
| BAC-51-15 | ATCAGGATGACACAAGTACATGAATTATATATTTTCATGGAAACATCATCATCTCTTCTTAGCTCAAAGGTAGATAAGGATGCATTCAATAGATCCAGCCAT |       |       |       |       |       |       |       |       |       |  |
|           | 20010                                                                                                  | 20020 | 20030 | 20040 | 20050 | 20060 | 20070 | 20080 | 20090 | 20100 |  |
| BAC-51    | .... .... .... .... .... .... .... .... .... .... .... .... .... .... ....                             |       |       |       |       |       |       |       |       |       |  |
| BAC-51-15 | ATAATGAGATCCTCCCAGCACGGTGTTGGTTCATGTATTTGACAGCTATATAATTAACCTCATGGTCTCTACTCTCTCTCTCTTTCTCTCTCTTTCTCTCT  |       |       |       |       |       |       |       |       |       |  |

[illegible]

### Deletion 1, 5' end

2010      2020      2030      2040      2050      2060      2070      2080      2090      20300  
 ....|....|....|....|....|....|....|....|....|....|....|....|....|....|....|....|....|....|....|....|....|....|  
 BAC-51      CTGTATGTGTCTGTTTATCTCTCTACAGATGTGGTAGAGTTTAGGGGTCAGTTTACACTGAAGAGCATTGAGAATCCTGGAACCGTTCTGTCTGAATACC  
 BAC-51-15      -----

[illegible]

Sequences (96,854 bp) in BAC-51 that are deleted in BAC-51-15 are omitted

[illegible]

|           |                                                                                                               |        |        |        |        |        |        |        |        |        |
|-----------|---------------------------------------------------------------------------------------------------------------|--------|--------|--------|--------|--------|--------|--------|--------|--------|
|           | 116710                                                                                                        | 116720 | 116730 | 116740 | 116750 | 116760 | 116770 | 116780 | 116790 | 116800 |
|           | .... .... .... .... .... .... .... .... .... .... .... .... .... .... .... .... .... .... .... .... .... .... |        |        |        |        |        |        |        |        |        |
| BAC-51    | TTCAATAGAAATCAGACAATATGTAATCAGACAATTATTTCCCTCACTTTCACTATTATATAAAATTTCTTTTGTCTATCTTCTTCTCTCTCTCCCC             |        |        |        |        |        |        |        |        |        |
| BAC-51-15 | -----                                                                                                         |        |        |        |        |        |        |        |        |        |

[illegible]

116910 116920 116930 116940 116950 116960 116970 116980 116990 117000

BAC-51 TGTCTTTGTCTCTTTGTCTCTCCCTCCCCCCCCCTCTCTCTCTCTCTATATATAATCAGACAATATATAATACCTATATCCCTCACTCTCACTTTTCTC

BAC-51-15 -----

[illegible]

### Deletion 1, 3' end

[illegible]

|           |                                                                                                         |        |        |        |        |        |        |        |        |        |
|-----------|---------------------------------------------------------------------------------------------------------|--------|--------|--------|--------|--------|--------|--------|--------|--------|
|           | 117210                                                                                                  | 117220 | 117230 | 117240 | 117250 | 117260 | 117270 | 117280 | 117290 | 117300 |
| BAC-51    | .... .... .... .... .... .... .... .... .... .... .... .... .... .... .... ....                         |        |        |        |        |        |        |        |        |        |
| BAC-51-15 | CAATCCAGCTGCATAAGGAAAACAATTATTAGGGGCTATAATATTGAACGCTTCACAAGTATTAGTATGAGTTCAGTTATATATTTTTATTGACAAAGT     |        |        |        |        |        |        |        |        |        |
|           | 117310                                                                                                  | 117320 | 117330 | 117340 | 117350 | 117360 | 117370 | 117380 | 117390 | 117400 |
| BAC-51    | .... .... .... .... .... .... .... .... .... .... .... .... .... .... .... ....                         |        |        |        |        |        |        |        |        |        |
| BAC-51-15 | CTTGACAAATTCAGTATCAATAAGAGTTTAAACAATTCGTCAACATTTTCATGCACCTTTCTACTGGCTAAGAGTCTCCTGTATCTGAATTTTAGACACAATA |        |        |        |        |        |        |        |        |        |
|           | 117410                                                                                                  | 117420 | 117430 | 117440 | 117450 | 117460 | 117470 | 117480 | 117490 | 117500 |
| BAC-51    | .... .... .... .... .... .... .... .... .... .... .... .... .... .... .... ....                         |        |        |        |        |        |        |        |        |        |
| BAC-51-15 | ATGTTTTAGTCTCTGGTAAGATATGCATTCTGTCCAAGGAAAGACATTAGTGACTATTAGTATATTTACACAAGCAATCTTTTTTATACAAATTGTACA     |        |        |        |        |        |        |        |        |        |
|           | 117510                                                                                                  | 117520 | 117530 | 117540 | 117550 | 117560 | 117570 | 117580 | 117590 | 117600 |
| BAC-51    | .... .... .... .... .... .... .... .... .... .... .... .... .... .... .... ....                         |        |        |        |        |        |        |        |        |        |
| BAC-51-15 | CCTCGGCGACCACATTGACGTCTTCTTCATTGACTGCGATCTCAACCACTTCAGGTGGTGAAGATGTCGTTACGCTTTCCGTCGTTGGATGCTCCTTCTC    |        |        |        |        |        |        |        |        |        |
|           | 117610                                                                                                  | 117620 | 117630 | 117640 | 117650 | 117660 | 117670 | 117680 | 117690 | 117700 |
| BAC-51    | .... .... .... .... .... .... .... .... .... .... .... .... .... .... .... ....                         |        |        |        |        |        |        |        |        |        |
| BAC-51-15 | CTCACTTTTCATTCTCACCCCAACGTCCTCGGTTACCATAGGGATGACGGTGGCCATCACGCCTGGGAGATCCTTCTTCGGTTCTGTTGCGTCTGCCGAAG   |        |        |        |        |        |        |        |        |        |
|           | 117710                                                                                                  | 117720 | 117730 | 117740 | 117750 | 117760 | 117770 | 117780 | 117790 | 117800 |
| BAC-51    | .... .... .... .... .... .... .... .... .... .... .... .... .... .... .... ....                         |        |        |        |        |        |        |        |        |        |
| BAC-51-15 | GGACGGTCTCCGAAAGGCTTTCTACCGAAGGGGTTGACCAGAAGGGCCTCATCTCAAACATTGGTCTGTCTGATCTCCATCTCCGGTCTTGTGTGTAT      |        |        |        |        |        |        |        |        |        |
|           | 117810                                                                                                  | 117820 | 117830 | 117840 | 117850 | 117860 | 117870 | 117880 | 117890 | 117900 |
| BAC-51    | .... .... .... .... .... .... .... .... .... .... .... .... .... .... .... ....                         |        |        |        |        |        |        |        |        |        |
| BAC-51-15 | GACGATGGGGGTGATCTCCCGTCTCATTATGACCCTGGTGACCTTCTGTGTGGTTGCGTCTGCCGAAGTGGTTGAACCGGAAGGGCCTCGTATCATTG      |        |        |        |        |        |        |        |        |        |
|           | 117910                                                                                                  | 117920 | 117930 | 117940 | 117950 | 117960 | 117970 | 117980 | 117990 | 118000 |
| BAC-51    | .... .... .... .... .... .... .... .... .... .... .... .... .... .... .... ....                         |        |        |        |        |        |        |        |        |        |
| BAC-51-15 | TTTGTCTGATCTTGATCTCCCGTCTCATTATGTCTTGGTGACCCTCTGTCTGGTTATGATGACGGTGGTGGTGGCCTTGGTGGCCATGGTGGCCATGA      |        |        |        |        |        |        |        |        |        |
|           | 118010                                                                                                  | 118020 | 118030 | 118040 | 118050 | 118060 | 118070 | 118080 | 118090 | 118100 |
| BAC-51    | .... .... .... .... .... .... .... .... .... .... .... .... .... .... .... ....                         |        |        |        |        |        |        |        |        |        |
| BAC-51-15 | TGGTGAGGGTGAGGACGGCCATCCTCCTCGTTGCGTTTCATTGCGCTGACCGAACGGTTGTTCTCTGGTCGGTCCTGAGGTGGACCTTGACGGTGACCAT    |        |        |        |        |        |        |        |        |        |
|           | 118110                                                                                                  | 118120 | 118130 | 118140 | 118150 | 118160 | 118170 | 118180 | 118190 | 118200 |
| BAC-51    | .... .... .... .... .... .... .... .... .... .... .... .... .... .... .... ....                         |        |        |        |        |        |        |        |        |        |
| BAC-51-15 | GATGACGACGTCCATGACCATCAAACCTGACCGCGCCCTCCTAGACCATCACCAATTTGTTGGGAAGCATCAGTTTCTTCTTCTCCATCACCACGTCTTCC   |        |        |        |        |        |        |        |        |        |

|           |                                                                                                        |        |        |        |        |        |        |        |        |        |
|-----------|--------------------------------------------------------------------------------------------------------|--------|--------|--------|--------|--------|--------|--------|--------|--------|
|           | 118210                                                                                                 | 118220 | 118230 | 118240 | 118250 | 118260 | 118270 | 118280 | 118290 | 118300 |
| BAC-51    | .... .... .... .... .... .... .... .... .... .... .... .... .... .... ....                             |        |        |        |        |        |        |        |        |        |
| BAC-51-15 | TCCTTGGCCGAAGAAAGGTCTTCCTCCAGCACCATCTGGTCTGGAGCCACCAAATCCAGGTCCGTGCAATCTCCTACCACCCATCGGACCGCCATTTTGT   |        |        |        |        |        |        |        |        |        |
|           | 118310                                                                                                 | 118320 | 118330 | 118340 | 118350 | 118360 | 118370 | 118380 | 118390 | 118400 |
| BAC-51    | .... .... .... .... .... .... .... .... .... .... .... .... .... .... ....                             |        |        |        |        |        |        |        |        |        |
| BAC-51-15 | CTGCGTCCATCCATATGTGGGGCACCAAATCCAGGTCCATCGAACCTCCTTCCACCCATTGGTCCACCATCTTGCCTAGATCCACCCATCTGCATTCCAC   |        |        |        |        |        |        |        |        |        |
|           | 118410                                                                                                 | 118420 | 118430 | 118440 | 118450 | 118460 | 118470 | 118480 | 118490 | 118500 |
| BAC-51    | .... .... .... .... .... .... .... .... .... .... .... .... .... .... ....                             |        |        |        |        |        |        |        |        |        |
| BAC-51-15 | CAGGCCTTCCCAAAGCGACCTTGTCTCTCTCTGCCATTCTCATTTCTCGCCGTTTCATTGAAATCTCTTCGTGCGTGAGCTGTAAGGGTTAATGA        |        |        |        |        |        |        |        |        |        |
|           | 118510                                                                                                 | 118520 | 118530 | 118540 | 118550 | 118560 | 118570 | 118580 | 118590 | 118600 |
| BAC-51    | .... .... .... .... .... .... .... .... .... .... .... .... .... .... ....                             |        |        |        |        |        |        |        |        |        |
| BAC-51-15 | AATAATCGAATTAATTAAGTAATCACATTCTGCATTATTATATTTGGCTCTACATTGGTTTATAGCAGGTGACAAATAAGAATGGTAACTCGCCCTTCTTA  |        |        |        |        |        |        |        |        |        |
|           | 118610                                                                                                 | 118620 | 118630 | 118640 | 118650 | 118660 | 118670 | 118680 | 118690 | 118700 |
| BAC-51    | .... .... .... .... .... .... .... .... .... .... .... .... .... .... ....                             |        |        |        |        |        |        |        |        |        |
| BAC-51-15 | TATTTTTT-TCCCTTTATGTTTAATCCTAATCCGTAAGTGCGGTTTCGATATTCAAACGCGCTAATTCTGACTGAATTAAATTTGATTACCAGATTGAACGT |        |        |        |        |        |        |        |        |        |
|           | 118710                                                                                                 | 118720 | 118730 | 118740 | 118750 | 118760 | 118770 | 118780 | 118790 | 118800 |
| BAC-51    | .... .... .... .... .... .... .... .... .... .... .... .... .... .... ....                             |        |        |        |        |        |        |        |        |        |
| BAC-51-15 | AAACATAATACATCCTTTGTCATTTCAGAAAACGGATTGGTGTAGGCTTAATAAATACAATTAATTATATTGTGTAACGAACAATTTAAAAATGCATAT    |        |        |        |        |        |        |        |        |        |
|           | 118810                                                                                                 | 118820 | 118830 | 118840 | 118850 | 118860 | 118870 | 118880 | 118890 | 118900 |
| BAC-51    | .... .... .... .... .... .... .... .... .... .... .... .... .... .... ....                             |        |        |        |        |        |        |        |        |        |
| BAC-51-15 | TACAAACTATGAAATAATCATATTTACTTCTGTGAGCCCTTCGTTGGCTTTATATTTAGCACTTATCAAGTAATACCGAGTAATAATTTGATTTCTTACC   |        |        |        |        |        |        |        |        |        |
|           | 118910                                                                                                 | 118920 | 118930 | 118940 | 118950 | 118960 | 118970 | 118980 | 118990 | 119000 |
| BAC-51    | .... .... .... .... .... .... .... .... .... .... .... .... .... .... ....                             |        |        |        |        |        |        |        |        |        |
| BAC-51-15 | CGAGATAGCAAGAGCAGCCACAATGGCAACGATCAATGTTGCTTTACCTCCATGTTTGTAAAGGTCTCTCCGATGCTACAAGCTTTCTCTAGATTTCGTTG  |        |        |        |        |        |        |        |        |        |
|           | 119010                                                                                                 | 119020 | 119030 | 119040 | 119050 | 119060 | 119070 | 119080 | 119090 | 119100 |
| BAC-51    | .... .... .... .... .... .... .... .... .... .... .... .... .... .... ....                             |        |        |        |        |        |        |        |        |        |
| BAC-51-15 | CCTTCCAAGAGAGAAGTCTGCTTCAAACTTAACAACCTACCTGCTGGGCCACTGAATTTATAGGTTTTCTACCTAGATTGATATCTCACACTAGTACCAGA  |        |        |        |        |        |        |        |        |        |

**Matched sequences (37,500 bp) between the BACs are omitted**

|           |                                                                                                        |        |        |        |        |        |        |        |        |        |
|-----------|--------------------------------------------------------------------------------------------------------|--------|--------|--------|--------|--------|--------|--------|--------|--------|
|           | 156610                                                                                                 | 156620 | 156630 | 156640 | 156650 | 156660 | 156670 | 156680 | 156690 | 156700 |
| BAC-51    | .... .... .... .... .... .... .... .... .... .... .... .... .... .... ....                             |        |        |        |        |        |        |        |        |        |
| BAC-51-15 | GGGCACCTTATCAGAGAAGAAAAGGAGTAGTTATAAAAAGGAG--AAGGGGCACTCTGTTTTAATGAAAAGCGCATTTATTAGAAAAGGTAAAGGGGCACT  |        |        |        |        |        |        |        |        |        |
|           | GGGCACCTTATCAGAGAAGAAAAGGAGTAGTTATAAAAAG-AGAAGAAGGGGCACTCTGTTTTAATGAAAAGCGCATTTATTAGAAAAGGTAAAGGGGCACT |        |        |        |        |        |        |        |        |        |

|           |                                                                                                         |        |        |        |        |        |        |        |        |        |
|-----------|---------------------------------------------------------------------------------------------------------|--------|--------|--------|--------|--------|--------|--------|--------|--------|
|           | 156710                                                                                                  | 156720 | 156730 | 156740 | 156750 | 156760 | 156770 | 156780 | 156790 | 156800 |
| BAC-51    | .... .... .... .... .... .... .... .... .... .... .... .... .... .... .... ....                         |        |        |        |        |        |        |        |        |        |
| BAC-51-15 | TGTCAAAGTAAACGAGCATCTCTCATATTTGAATAGGGGCAATTATCGGACGTGAAAGAAGCACTAGTCTTATCTGAAATGAAAAGGAGCAACTTCTTT     |        |        |        |        |        |        |        |        |        |
|           | 156810                                                                                                  | 156820 | 156830 | 156840 | 156850 | 156860 | 156870 | 156880 | 156890 | 156900 |
| BAC-51    | .... .... .... .... .... .... .... .... .... .... .... .... .... .... .... ....                         |        |        |        |        |        |        |        |        |        |
| BAC-51-15 | TTACCTGAAAGGGGTCATTACCAGAGCTGAAAAGAGGCATTTATGAAAAGGAGAAGGGGATCTTTGTTTTAATGGGG-AACTAACCATCAGGAAAAGGG     |        |        |        |        |        |        |        |        |        |
|           | 156910                                                                                                  | 156920 | 156930 | 156940 | 156950 | 156960 | 156970 | 156980 | 156990 | 157000 |
| BAC-51    | .... .... .... .... .... .... .... .... .... .... .... .... .... .... .... ....                         |        |        |        |        |        |        |        |        |        |
| BAC-51-15 | GCACCTCTCAAATGTTAATAAGGCAATTATCAGAGGTGAAGGGGGCACTTATTACAAGTGAAGGGCGCACGTATCGTACCTGAAAAGAGGCACCTTACTA    |        |        |        |        |        |        |        |        |        |
|           | 157010                                                                                                  | 157020 | 157030 | 157040 | 157050 | 157060 | 157070 | 157080 | 157090 | 157100 |
| BAC-51    | .... .... .... .... .... .... .... .... .... .... .... .... .... .... .... ....                         |        |        |        |        |        |        |        |        |        |
| BAC-51-15 | GACATTAAGAGGCACACAGCATGAGTAGTAAACACAGCCGTGGAAAAATGTAAGCAACACAAGTTCGTATATAGTCGTACGATGAGCGATTGAAACAA      |        |        |        |        |        |        |        |        |        |
|           | 157110                                                                                                  | 157120 | 157130 | 157140 | 157150 | 157160 | 157170 | 157180 | 157190 | 157200 |
| BAC-51    | .... .... .... .... .... .... .... .... .... .... .... .... .... .... .... ....                         |        |        |        |        |        |        |        |        |        |
| BAC-51-15 | CGAAGTCTGACGGATCTTTGGTCTGAAGAGCACACCTGTCTGAGCACTGGCGTACTGGTAGGGGGCTAGGGG-AGGGGGGGGGG-CGCCATCCCCCAAATAAA |        |        |        |        |        |        |        |        |        |
|           | 157210                                                                                                  | 157220 | 157230 | 157240 | 157250 | 157260 | 157270 | 157280 | 157290 | 157300 |
| BAC-51    | .... .... .... .... .... .... .... .... .... .... .... .... .... .... .... ....                         |        |        |        |        |        |        |        |        |        |
| BAC-51-15 | ATTGAACCATGACATATTTTCAATTCATATACAAGTGATGTATAAATGTTTCGTGATATCATATGATTTTCAACAAAATGCGTTTTTCTCCATTTCTGTT    |        |        |        |        |        |        |        |        |        |
|           | 157310                                                                                                  | 157320 | 157330 | 157340 | 157350 | 157360 | 157370 | 157380 | 157390 | 157400 |
| BAC-51    | .... .... .... .... .... .... .... .... .... .... .... .... .... .... .... ....                         |        |        |        |        |        |        |        |        |        |
| BAC-51-15 | GCAAACTGACACATTCCCGAAGCCAGGAAGAGCATATGTTTTTTTTATAATCACTAAGGGGCTTATAGTGGCCACTAACAGTAACACTTGTATAAAAAA     |        |        |        |        |        |        |        |        |        |
|           | 157410                                                                                                  | 157420 | 157430 | 157440 | 157450 | 157460 | 157470 | 157480 | 157490 | 157500 |
| BAC-51    | .... .... .... .... .... .... .... .... .... .... .... .... .... .... .... ....                         |        |        |        |        |        |        |        |        |        |
| BAC-51-15 | ACACACTCATTACAGTGTGAACACACAGTTCACACTGTGAACGGAGCCTTTTCACAGTGTGGACACTGTCACAATGTGGTAAA--CCACACAGTATTCA     |        |        |        |        |        |        |        |        |        |
|           | 157510                                                                                                  | 157520 | 157530 | 157540 | 157550 | 157560 | 157570 | 157580 | 157590 | 157600 |
| BAC-51    | .... .... .... .... .... .... .... .... .... .... .... .... .... .... .... ....                         |        |        |        |        |        |        |        |        |        |
| BAC-51-15 | CATTGTAAAATTCGATTTTCACAGTGTGAATGTACCTGCTCACAGTGTGAAAATGATTTTCACAGTGTGACCAAACCTGTGATAAATAGATTTTCACAGTGTG |        |        |        |        |        |        |        |        |        |

**Deletion 2, 5' end, this is likely an assembly artifact**

|           |                                                                                                    |        |        |        |        |        |        |        |        |        |
|-----------|----------------------------------------------------------------------------------------------------|--------|--------|--------|--------|--------|--------|--------|--------|--------|
|           | 157610                                                                                             | 157620 | 157630 | 157640 | 157650 | 157660 | 157670 | 157680 | 157690 | 157700 |
| BAC-51    | .... .... .... .... .... .... .... .... .... .... .... .... .... .... .... ....                    |        |        |        |        |        |        |        |        |        |
| BAC-51-15 | AATACCTTACGACATACATTTACGGTGTGAACAGTAAATTTCTCAGTGTGGCCACTCTGTGAAAAATACTTCACATTGTGAAAAATAGAATTCACAGT |        |        |        |        |        |        |        |        |        |

|           |                                                                                                      |        |        |        |        |        |        |        |        |        |
|-----------|------------------------------------------------------------------------------------------------------|--------|--------|--------|--------|--------|--------|--------|--------|--------|
|           | 157710                                                                                               | 157720 | 157730 | 157740 | 157750 | 157760 | 157770 | 157780 | 157790 | 157800 |
| BAC-51    | .... .... .... .... .... .... .... .... .... .... .... .... .... .... ....                           |        |        |        |        |        |        |        |        |        |
| BAC-51-15 | ATGGCCGCTGGAATACTAGTGTTTTGGATCGAGGCCAATCAAGTTTCCGTGATAACAGACGAATATGTACAACTACATGTTGACGGATGAGAACATAATT |        |        |        |        |        |        |        |        |        |
|           | -----                                                                                                |        |        |        |        |        |        |        |        |        |

|           |                                                                                                      |        |        |        |        |        |        |        |        |        |
|-----------|------------------------------------------------------------------------------------------------------|--------|--------|--------|--------|--------|--------|--------|--------|--------|
|           | 157810                                                                                               | 157820 | 157830 | 157840 | 157850 | 157860 | 157870 | 157880 | 157890 | 157900 |
| BAC-51    | .... .... .... .... .... .... .... .... .... .... .... .... .... .... ....                           |        |        |        |        |        |        |        |        |        |
| BAC-51-15 | GGAATGGCGGACATGGCCTGGTGAAGTTTCCCAACGGCTAGGATAGCTATCAGGCGAGGGTGTTGCCGGGCTGCTGCCGGGCTGTCATTGAATGGTGAGT |        |        |        |        |        |        |        |        |        |
|           | -----                                                                                                |        |        |        |        |        |        |        |        |        |

**Sequence (2,270 bp) in BAC-51 that deleted from BAC-51-15 is omitted, this is likely an assembly artifact**

|           |                                                                                                   |        |        |        |        |        |        |        |        |        |
|-----------|---------------------------------------------------------------------------------------------------|--------|--------|--------|--------|--------|--------|--------|--------|--------|
|           | 159510                                                                                            | 159520 | 159530 | 159540 | 159550 | 159560 | 159570 | 159580 | 159590 | 159600 |
| BAC-51    | .... .... .... .... .... .... .... .... .... .... .... .... .... .... ....                        |        |        |        |        |        |        |        |        |        |
| BAC-51-15 | TCCTGGAGTATGCGTGCGTGACAGTGCGGGATCCTCACACCCAGGACAACATACACAGGTGGAAATGGTACAGCTCCGCAACGCCAGTTTATCACTG |        |        |        |        |        |        |        |        |        |
|           | -----                                                                                             |        |        |        |        |        |        |        |        |        |

|           |                                                                                                       |        |        |        |        |        |        |        |        |        |
|-----------|-------------------------------------------------------------------------------------------------------|--------|--------|--------|--------|--------|--------|--------|--------|--------|
|           | 159610                                                                                                | 159620 | 159630 | 159640 | 159650 | 159660 | 159670 | 159680 | 159690 | 159700 |
| BAC-51    | .... .... .... .... .... .... .... .... .... .... .... .... .... .... ....                            |        |        |        |        |        |        |        |        |        |
| BAC-51-15 | GAGATCACCATCATAACCAGCAGCATCGCACCAATGCTGCAACATCTCAAATGGCCATCTCTCCGAGAACGCAGGGCACGGTTTAAGATGGTGATAGTGTA |        |        |        |        |        |        |        |        |        |
|           | -----                                                                                                 |        |        |        |        |        |        |        |        |        |

|           |                                                                                                     |        |        |        |        |        |        |        |        |        |
|-----------|-----------------------------------------------------------------------------------------------------|--------|--------|--------|--------|--------|--------|--------|--------|--------|
|           | 159710                                                                                              | 159720 | 159730 | 159740 | 159750 | 159760 | 159770 | 159780 | 159790 | 159800 |
| BAC-51    | .... .... .... .... .... .... .... .... .... .... .... .... .... .... ....                          |        |        |        |        |        |        |        |        |        |
| BAC-51-15 | CGGAACTGTCAACCTGCACTCAGAGTTTCTCAAAATGTACCTTCTATCGGTGTTAACATCTACCATGGTCATACCCAGTAATTCCAAATACAATTTACA |        |        |        |        |        |        |        |        |        |
|           | -----                                                                                               |        |        |        |        |        |        |        |        |        |

|           |                                                                                                     |        |        |        |        |        |        |        |        |        |
|-----------|-----------------------------------------------------------------------------------------------------|--------|--------|--------|--------|--------|--------|--------|--------|--------|
|           | 159810                                                                                              | 159820 | 159830 | 159840 | 159850 | 159860 | 159870 | 159880 | 159890 | 159900 |
| BAC-51    | .... .... .... .... .... .... .... .... .... .... .... .... .... .... ....                          |        |        |        |        |        |        |        |        |        |
| BAC-51-15 | ATGACTCTCGTATACCAGAAGTCATTCTTCCCGATTCCATCATGCTTTGGAACTTGCTACCTGCTGGATTGTCAACTGTACTTTTCGCTAAAGCTTTTA |        |        |        |        |        |        |        |        |        |
|           | -----CATCATGCTTTGGAACTTGCTACCTGCTGGATTGTCAACTGTACTTTTCGCTAAAGCTTTTA                                 |        |        |        |        |        |        |        |        |        |

**Deletion 2, 3' end, this is likely an assembly artifact**

|           |                                                                                                    |        |        |        |        |        |        |        |        |        |
|-----------|----------------------------------------------------------------------------------------------------|--------|--------|--------|--------|--------|--------|--------|--------|--------|
|           | 159910                                                                                             | 159920 | 159930 | 159940 | 159950 | 159960 | 159970 | 159980 | 159990 | 160000 |
| BAC-51    | .... .... .... .... .... .... .... .... .... .... .... .... .... .... ....                         |        |        |        |        |        |        |        |        |        |
| BAC-51-15 | AGCAAGAGGTACAAAATTTCCATCTCCGTTAGAAGGGGAAGAAGGATTTTAACTGCTCATAGAATATTATAGAAAGTTTAAATTCGCACTGTATATTC |        |        |        |        |        |        |        |        |        |
|           | AGCAAGAGGTACAAAATTTCCATCTCCGTTAGAAGGGGAAGAAGGATTTTAACTGCTCATAGAATATTATAGAAAGTTTAAATTCGCACTGTATATTC |        |        |        |        |        |        |        |        |        |

|           |                                                                                                       |        |        |        |        |        |        |        |        |        |
|-----------|-------------------------------------------------------------------------------------------------------|--------|--------|--------|--------|--------|--------|--------|--------|--------|
|           | 160010                                                                                                | 160020 | 160030 | 160040 | 160050 | 160060 | 160070 | 160080 | 160090 | 160100 |
| BAC-51    | .... .... .... .... .... .... .... .... .... .... .... .... .... .... ....                            |        |        |        |        |        |        |        |        |        |
| BAC-51-15 | GCGACACCAGACCTGACGTACGTGATACACCATACGGTGGACTGGAGTGATATCTCAAGATCTGGGGGATGATAATTCCGGGCTTTAACAAATTGTGTGAT |        |        |        |        |        |        |        |        |        |
|           | GCGACACCAGACCTGACGTACGTGATACACCATACGGTGGACTGGAGTGATATCTCAAGATCTGGGGGATGATAATTCCGGGCTTTAACAAATTGTGTGAT |        |        |        |        |        |        |        |        |        |

|           |                                                                                                      |        |        |        |        |        |        |        |        |        |
|-----------|------------------------------------------------------------------------------------------------------|--------|--------|--------|--------|--------|--------|--------|--------|--------|
|           | 160110                                                                                               | 160120 | 160130 | 160140 | 160150 | 160160 | 160170 | 160180 | 160190 | 160200 |
| BAC-51    | .... .... .... .... .... .... .... .... .... .... .... .... .... .... ....                           |        |        |        |        |        |        |        |        |        |
| BAC-51-15 | AGTGGAGGTATTATTTTTGACTGCACAGTCGGAAGTTCCATCTAGTTATAATATCCTAACATCAGTATATTATCGCTAGAACAAAAAATCATAAGTTACT |        |        |        |        |        |        |        |        |        |
|           | AGTGGAGGTATTATTTTTGACTGCACAGTCGGAAGTTCCATCTAGTTATAATATCCTAACATCAGTATATTATCGCTAGAACAAAAAATCATAAGTTACT |        |        |        |        |        |        |        |        |        |

|           |                                                                                                        |        |        |        |        |        |        |        |        |        |
|-----------|--------------------------------------------------------------------------------------------------------|--------|--------|--------|--------|--------|--------|--------|--------|--------|
|           | 160210                                                                                                 | 160220 | 160230 | 160240 | 160250 | 160260 | 160270 | 160280 | 160290 | 160300 |
| BAC-51    | .... .... .... .... .... .... .... .... .... .... .... .... .... .... .... ....                        |        |        |        |        |        |        |        |        |        |
| BAC-51-15 | TATGTAGTTTAGGAAGTACATATATTTTTGTATGCCATTCTGCTTTTTTCTGTGCCACCGTATATAGAGTGTATGGTTATTTATTTGTAAAAAGATGAGC   |        |        |        |        |        |        |        |        |        |
|           | 160310                                                                                                 | 160320 | 160330 | 160340 | 160350 | 160360 | 160370 | 160380 | 160390 | 160400 |
| BAC-51    | .... .... .... .... .... .... .... .... .... .... .... .... .... .... .... ....                        |        |        |        |        |        |        |        |        |        |
| BAC-51-15 | AAAATCTGTTTTTTTCTCATCTTCAGGTATTTATTAGTATTAGTTGTAGAAATTTATGTAGCCATAACAGTAAAACGTGTCTGCCTAAAATAGATTGT     |        |        |        |        |        |        |        |        |        |
|           | 160410                                                                                                 | 160420 | 160430 | 160440 | 160450 | 160460 | 160470 | 160480 | 160490 | 160500 |
| BAC-51    | .... .... .... .... .... .... .... .... .... .... .... .... .... .... .... ....                        |        |        |        |        |        |        |        |        |        |
| BAC-51-15 | TTTCAACTTTTTTTTCAAGATGTATTGACAGAGATATTTTGAACCTTTTTATCATTTTTAATAGGTTTATGAAGAACCTGTATGTGCCAAAGATTTTCTGAT |        |        |        |        |        |        |        |        |        |
|           | 160510                                                                                                 | 160520 | 160530 | 160540 | 160550 | 160560 | 160570 | 160580 | 160590 | 160600 |
| BAC-51    | .... .... .... .... .... .... .... .... .... .... .... .... .... .... .... ....                        |        |        |        |        |        |        |        |        |        |
| BAC-51-15 | ACATTGCAATTGCCAAAGTTACATGTCATGTGTGGATATTTCTATACTTGGAAATGTGACTAGCCATACTAATGTATCTTCATAAATTTAATATACCTAC   |        |        |        |        |        |        |        |        |        |
|           | 160610                                                                                                 | 160620 | 160630 | 160640 | 160650 | 160660 | 160670 | 160680 | 160690 | 160700 |
| BAC-51    | .... .... .... .... .... .... .... .... .... .... .... .... .... .... .... ....                        |        |        |        |        |        |        |        |        |        |
| BAC-51-15 | AGAAATGTTTAAAGAGATATTGCCAGAGATGCTCTAAACCTATTTT-ATTACTGACGTAACATGCTAATGTGCTTTTATTATGTTTTACGAGTGTGAGTAC  |        |        |        |        |        |        |        |        |        |
|           | 160710                                                                                                 | 160720 | 160730 | 160740 | 160750 | 160760 | 160770 | 160780 | 160790 | 160800 |
| BAC-51    | .... .... .... .... .... .... .... .... .... .... .... .... .... .... .... ....                        |        |        |        |        |        |        |        |        |        |
| BAC-51-15 | GAGTTCAGGGAAATATTGATGATATGTGCAATTTTTGCCGTCACCTGTAATTTATTCCTCGATGTTATACAGTGGAAACCTCTATAACTCTATTTCACAAGT |        |        |        |        |        |        |        |        |        |
|           | 160810                                                                                                 | 160820 | 160830 | 160840 | 160850 | 160860 | 160870 | 160880 | 160890 | 160900 |
| BAC-51    | .... .... .... .... .... .... .... .... .... .... .... .... .... .... .... ....                        |        |        |        |        |        |        |        |        |        |
| BAC-51-15 | CCACGTTTTTCTGTAATTCATTGTTTTAAACCCTTGTACAATAAGATATCTGATATAAAGAGGTCAATTTAGTGGACACCAATGTGCTCATTATAATGAG   |        |        |        |        |        |        |        |        |        |
|           | 160910                                                                                                 | 160920 | 160930 | 160940 | 160950 | 160960 | 160970 | 160980 | 160990 | 161000 |
| BAC-51    | .... .... .... .... .... .... .... .... .... .... .... .... .... .... .... ....                        |        |        |        |        |        |        |        |        |        |
| BAC-51-15 | GTTTCACTGTAGATAGCAAGTTCTGTTTTTCAAGATATCTCTACTATCTAATTTAAACTGTTTGGATTCAATTTGTCTTTGTTTTCACTCTGGTTCACATC  |        |        |        |        |        |        |        |        |        |
|           | 161010                                                                                                 | 161020 | 161030 | 161040 | 161050 | 161060 | 161070 | 161080 | 161090 | 161100 |
| BAC-51    | .... .... .... .... .... .... .... .... .... .... .... .... .... .... .... ....                        |        |        |        |        |        |        |        |        |        |
| BAC-51-15 | ATGTTGGCATTACAGAGTAAAATTTGTTTATCTGTAAGTATAGTATTACTGCAATCTTTGTATACCTAAGAGGTATATGTTTCATAAGTCCTTTTAGCGA   |        |        |        |        |        |        |        |        |        |
|           | 161110                                                                                                 | 161120 | 161130 | 161140 | 161150 | 161160 | 161170 | 161180 | 161190 | 161200 |
| BAC-51    | .... .... .... .... .... .... .... .... .... .... .... .... .... .... .... ....                        |        |        |        |        |        |        |        |        |        |
| BAC-51-15 | AAAGTACATCAATATAAGCTTTTGAATACATTTTAAGTTACCTCATAAAGGCTATAACATGTATATGTTTAAGATTACTGTATTATTTTCAGATGTTTC    |        |        |        |        |        |        |        |        |        |



|           |                                                                                                               |        |        |        |        |        |        |        |        |        |
|-----------|---------------------------------------------------------------------------------------------------------------|--------|--------|--------|--------|--------|--------|--------|--------|--------|
|           | 161210                                                                                                        | 161220 | 161230 | 161240 | 161250 | 161260 | 161270 | 161280 | 161290 | 161300 |
| BAC-51    | .... .... .... .... .... .... .... .... .... .... .... .... .... .... .... .... .... .... .... .... .... .... |        |        |        |        |        |        |        |        |        |
| BAC-51-15 | GGGGGTATATTCTATTTAAGTTGAGTTTATAAGTGAGACATTGATTATAAACCTTTTCTCCTTCGTATTTATACGTACTAAGCTCTACATGACTACATT           |        |        |        |        |        |        |        |        |        |
|           | 161310                                                                                                        | 161320 | 161330 | 161340 | 161350 | 161360 | 161370 | 161380 | 161390 | 161400 |
| BAC-51    | .... .... .... .... .... .... .... .... .... .... .... .... .... .... .... .... .... .... .... .... .... .... |        |        |        |        |        |        |        |        |        |
| BAC-51-15 | TTCATAGTTTGAAATATTTACACAGAATTCAAAAATAAACTTGTATCACAGTGTGGTGGGCGTTTCACAGTGTGGTAATCTCATACAATATAATGTGT            |        |        |        |        |        |        |        |        |        |
|           | 161410                                                                                                        | 161420 | 161430 | 161440 | 161450 | 161460 | 161470 | 161480 | 161490 | 161500 |
| BAC-51    | .... .... .... .... .... .... .... .... .... .... .... .... .... .... .... .... .... .... .... .... .... .... |        |        |        |        |        |        |        |        |        |
| BAC-51-15 | CACAATGTAACGTAGTGGGCGTTTCACAGTGTGTTTGGTGTTCACAGTGTGGTGGGCGTTTCACAGTGTGGTAATCTCATACAATATAATGTGT                |        |        |        |        |        |        |        |        |        |
|           | 161510                                                                                                        | 161520 | 161530 | 161540 | 161550 | 161560 | 161570 | 161580 | 161590 | 161600 |
| BAC-51    | .... .... .... .... .... .... .... .... .... .... .... .... .... .... .... .... .... .... .... .... .... .... |        |        |        |        |        |        |        |        |        |
| BAC-51-15 | TCACATTGTGGTTGCTTCGTTTACAGTGTGGTTCACAGTGTGGATATCTACACTGAAACGACGCGACCACAATGTGAAAATACCCCAATGTAACATTGT           |        |        |        |        |        |        |        |        |        |
|           | 161610                                                                                                        | 161620 | 161630 | 161640 | 161650 | 161660 | 161670 | 161680 | 161690 | 161700 |
| BAC-51    | .... .... .... .... .... .... .... .... .... .... .... .... .... .... .... .... .... .... .... .... .... .... |        |        |        |        |        |        |        |        |        |
| BAC-51-15 | GGGCGTTTCACAGTGTGTTTCTGTTTCAAAGTGTGCTGGGCATTTCACTGTGTGAGTGTTTACAATGTTAAATTGGGGCGTTTCACATTGTGGTCGCTT           |        |        |        |        |        |        |        |        |        |
|           | 161710                                                                                                        | 161720 | 161730 | 161740 | 161750 | 161760 | 161770 | 161780 | 161790 | 161800 |
| BAC-51    | .... .... .... .... .... .... .... .... .... .... .... .... .... .... .... .... .... .... .... .... .... .... |        |        |        |        |        |        |        |        |        |
| BAC-51-15 | CGTTTCACAGTTGGGTTACACAGTATGAAACGACGCGACCACAATGTGAAAACGCCCAATTTAACATTGTGGGCGTTACACAGTGTGGTGGGCATTTTAC          |        |        |        |        |        |        |        |        |        |
|           | 161810                                                                                                        | 161820 | 161830 | 161840 | 161850 | 161860 | 161870 | 161880 | 161890 | 161900 |
| BAC-51    | .... .... .... .... .... .... .... .... .... .... .... .... .... .... .... .... .... .... .... .... .... .... |        |        |        |        |        |        |        |        |        |
| BAC-51-15 | TGTGTGAGTGTTTACAATGTTAAATTGGGGCGTTTTCACAGTGTGATTACACTGTGTTTACACTGTGAATGAGTGTTGTGGTCTGGTCTGGTCGCGAC            |        |        |        |        |        |        |        |        |        |

## Alignment 2. BAC-52 and BAC-52-2b

|          |                                                                                                                |       |       |       |       |       |       |       |       |       |
|----------|----------------------------------------------------------------------------------------------------------------|-------|-------|-------|-------|-------|-------|-------|-------|-------|
|          | 9910                                                                                                           | 9920  | 9930  | 9940  | 9950  | 9960  | 9970  | 9980  | 9990  | 10000 |
| BAC52    | .... .... .... .... .... .... .... .... .... .... .... .... .... .... .... .... .... .... .... .... .... ....  |       |       |       |       |       |       |       |       |       |
| BAC52-2b | CATACTGAAT ACTAAAAATT GTAAAAATAA -GATGTAGCT GAACCTCATAC GAAGGTAATG TGCAATAATA AAGCCCCGAA TATTTTCCTG ACGCAGATGA |       |       |       |       |       |       |       |       |       |
|          | 10010                                                                                                          | 10020 | 10030 | 10040 | 10050 | 10060 | 10070 | 10080 | 10090 | 10100 |
| BAC52    | .... .... .... .... .... .... .... .... .... .... .... .... .... .... .... .... .... .... .... .... .... ....  |       |       |       |       |       |       |       |       |       |
| BAC52-2b | ATTGATCATT GTTATTGAAT CAATGAGGAA GACGAAATGA AGGAAAAAGG AATACAATGT ATATAGAGAT AGAGAGAGAG AGAGAGAGAG --ATAGAGAG  |       |       |       |       |       |       |       |       |       |

|                 |            |             |            |            |            |            |            |            |            |            |
|-----------------|------------|-------------|------------|------------|------------|------------|------------|------------|------------|------------|
|                 | 10110      | 10120       | 10130      | 10140      | 10150      | 10160      | 10170      | 10180      | 10190      | 10200      |
| <b>BAC52</b>    | .... ....  | .... ....   | .... ....  | .... ....  | .... ....  | .... ....  | .... ....  | .... ....  | .... ....  | .... ....  |
| <b>BAC52-2b</b> | GGATATATAT | ATATATATAT  | ATATATATAG | AGAGAGAGAG | AGAGAGAGAG | AGA--GAATG | AGATAGAGAG | AAATAAAAGA | GAGAGAGAGA | GAA-GAAAGA |
|                 | 10210      | 10220       | 10230      | 10240      | 10250      | 10260      | 10270      | 10280      | 10290      | 10300      |
| <b>BAC52</b>    | .... ....  | .... ....   | .... ....  | .... ....  | .... ....  | .... ....  | .... ....  | .... ....  | .... ....  | .... ....  |
| <b>BAC52-2b</b> | GAGAGG-AGA | GGTGAGATAG  | ATAGAAAGGG | TAGAGAGAGA | TGAAGAGACA | AAAGAAATAG | AGATATGTAG | AGATAGAGAG | AGCGAGAGGG | AGAGACAAAG |
|                 | 10310      | 10320       | 10330      | 10340      | 10350      | 10360      | 10370      | 10380      | 10390      | 10400      |
| <b>BAC52</b>    | .... ....  | .... ....   | .... ....  | .... ....  | .... ....  | .... ....  | .... ....  | .... ....  | .... ....  | .... ....  |
| <b>BAC52-2b</b> | AGACAGAGAG | ACAAAGAGAA  | TATGAGAGTG | AGATGGAGAG | AGATATGAGT | GTGAGAGAAA | GAGG-AGAGA | GAGAGAGAGA | GAGAGAGAGA | GAGAAGATAG |
|                 | 10410      | 10420       | 10430      | 10440      | 10450      | 10460      | 10470      | 10480      | 10490      | 10500      |
| <b>BAC52</b>    | .... ....  | .... ....   | .... ....  | .... ....  | .... ....  | .... ....  | .... ....  | .... ....  | .... ....  | .... ....  |
| <b>BAC52-2b</b> | ATAAGATTAT | TTATATATAC  | AATGCGTATA | AAAAAAAGTG | TGCCCAACTT | TAGTAACCTC | TACTTAAAAA | TTTATAACAT | ATAAACTGAT | ATCCTGTCTA |
|                 | 10510      | 10520       | 10530      | 10540      | 10550      | 10560      | 10570      | 10580      | 10590      | 10600      |
| <b>BAC52</b>    | .... ....  | .... ....   | .... ....  | .... ....  | .... ....  | .... ....  | .... ....  | .... ....  | .... ....  | .... ....  |
| <b>BAC52-2b</b> | ATGATTTTAT | ATTTCATAATT | GTACTGCCAT | GGATGATTGA | GCAGCAGGCT | TTTTATAAAG | TTTTTTTCAA | ATCCTTTTTG | AACCAAGTTT | GGGCCGAAGC |
|                 | 10610      | 10620       | 10630      | 10640      | 10650      | 10660      | 10670      | 10680      | 10690      | 10700      |
| <b>BAC52</b>    | .... ....  | .... ....   | .... ....  | .... ....  | .... ....  | .... ....  | .... ....  | .... ....  | .... ....  | .... ....  |
| <b>BAC52-2b</b> | AATGGATGCG | GGTCAAAAGT  | CATTATGTGT | GGGTTATCTC | ATTCCATAAA | CAATTGTTCT | CTTATGAATA | CTAACTATTA | GGCTGTTGAA | GATAAAAGGT |
|                 | 10710      | 10720       | 10730      | 10740      | 10750      | 10760      | 10770      | 10780      | 10790      | 10800      |
| <b>BAC52</b>    | .... ....  | .... ....   | .... ....  | .... ....  | .... ....  | .... ....  | .... ....  | .... ....  | .... ....  | .... ....  |
| <b>BAC52-2b</b> | GTGAATATCA | ACTCAAGCTA  | TAAAGGAAAT | TTTATCACAA | ACAAAATGTA | TGATATTCTC | TTTGTTATGA | TGAATAAAAT | CTTAAATTCA | TTCGTATCCC |
|                 | 10810      | 10820       | 10830      | 10840      | 10850      | 10860      | 10870      | 10880      | 10890      | 10900      |
| <b>BAC52</b>    | .... ....  | .... ....   | .... ....  | .... ....  | .... ....  | .... ....  | .... ....  | .... ....  | .... ....  | .... ....  |
| <b>BAC52-2b</b> | TTGTTTAAGG | AAACCTTTCT  | CAGTGATAAA | AAACCGATCG | GGACGTTATC | TTCTTTATTA | AAGTCTCATC | GTAATAATAA | TATGAAAAAT | TTATATAGCG |
|                 | 10910      | 10920       | 10930      | 10940      | 10950      | 10960      | 10970      | 10980      | 10990      | 11000      |
| <b>BAC52</b>    | .... ....  | .... ....   | .... ....  | .... ....  | .... ....  | .... ....  | .... ....  | .... ....  | .... ....  | .... ....  |
| <b>BAC52-2b</b> | CTTGTGACAA | AAGTTTCAAA  | GCACTCGTGT | GTTTCGTTCT | GCATTTGGAT | GTAGTAACCT | TTGAGTTTTT | ATTCGCTATT | CAATATAAAC | ACCATAATGT |
|                 | 11010      | 11020       | 11030      | 11040      | 11050      | 11060      | 11070      | 11080      | 11090      | 11100      |
| <b>BAC52</b>    | .... ....  | .... ....   | .... ....  | .... ....  | .... ....  | .... ....  | .... ....  | .... ....  | .... ....  | .... ....  |
| <b>BAC52-2b</b> | GCTCATTACG | CGTGTGAAAT  | TGTGTAGAGG | ACAAGTGAGC | AGAGAGAAAT | TAGATATAAT | GAAACAAGAA | GTTAGTTGGC | TGTTCAAAAT | AACTAAAAGT |

|          |            |            |            |            |            |            |            |            |            |            |
|----------|------------|------------|------------|------------|------------|------------|------------|------------|------------|------------|
|          | 11110      | 11120      | 11130      | 11140      | 11150      | 11160      | 11170      | 11180      | 11190      | 11200      |
| BAC52    | .... ....  | .... ....  | .... ....  | .... ....  | .... ....  | .... ....  | .... ....  | .... ....  | .... ....  | .... ....  |
| BAC52-2b | TTTCCCCGGG | GTCGTAACAA | GGTTCTGCGA | AACAGGGGCG | GATCTAGCCG | GCGGCGAGGG | TGGGGGGGGG | GGGG----CA | ATTTAAGAAA | ATAGTTAGCG |

  

|          |            |            |            |            |            |            |            |            |            |            |
|----------|------------|------------|------------|------------|------------|------------|------------|------------|------------|------------|
|          | 11210      | 11220      | 11230      | 11240      | 11250      | 11260      | 11270      | 11280      | 11290      | 11300      |
| BAC52    | .... ....  | .... ....  | .... ....  | .... ....  | .... ....  | .... ....  | .... ....  | .... ....  | .... ....  | .... ....  |
| BAC52-2b | CCGAATTAGC | CGGCGAAAAA | GCAATAGGGG | GGG--TTAAT | GAGCAATAAA | TTGTTATTTC | TTTTTTGCTC | AACGGGGGGG | GGGGTAGTGC | ATGCGCGGAT |

Deletion 1, 5' end

  

|          |            |            |            |            |            |            |            |           |            |            |
|----------|------------|------------|------------|------------|------------|------------|------------|-----------|------------|------------|
|          | 11310      | 11320      | 11330      | 11340      | 11350      | 11360      | 11370      | 11380     | 11390      | 11400      |
| BAC52    | .... ....  | .... ....  | .... ....  | .... ....  | .... ....  | .... ....  | .... ....  | .... .... | .... ....  | .... ....  |
| BAC52-2b | CCAGGGGAGG | CCCCCGCCCC | CCCAAAAAAG | TTTTTAATTT | TTTGTTTTTT | TAAATGGAGA | CAGATAAAAA | TTAGTGCTC | ACTACCACCC | CCCCCCCCCC |

  

|          |            |            |            |            |             |            |            |            |            |            |
|----------|------------|------------|------------|------------|-------------|------------|------------|------------|------------|------------|
|          | 11410      | 11420      | 11430      | 11440      | 11450       | 11460      | 11470      | 11480      | 11490      | 11500      |
| BAC52    | .... ....  | .... ....  | .... ....  | .... ....  | .... ....   | .... ....  | .... ....  | .... ....  | .... ....  | .... ....  |
| BAC52-2b | CCCCCTACTG | AGCAAAATTT | ATCGGCCGGC | ACGATTTTCG | AATTTACACCA | CGCTAAATTA | AAAATTGATT | TCAAATTTGG | GTCTCCCCTA | AGGAATCTGT |

  

|          |            |            |            |            |            |            |            |            |            |            |
|----------|------------|------------|------------|------------|------------|------------|------------|------------|------------|------------|
|          | 11510      | 11520      | 11530      | 11540      | 11550      | 11560      | 11570      | 11580      | 11590      | 11600      |
| BAC52    | .... ....  | .... ....  | .... ....  | .... ....  | .... ....  | .... ....  | .... ....  | .... ....  | .... ....  | .... ....  |
| BAC52-2b | GACCCGCGCC | AGTAGTAAGC | ACTATTTTTA | TTTACTGAAC | CCCCCCCCTT | GAGCAAAAAC | AAAAAGAAGG | TAAGATTGTG | GATACTATCT | TTGTTTAAAT |

  

|          |            |            |            |            |            |            |            |            |            |            |
|----------|------------|------------|------------|------------|------------|------------|------------|------------|------------|------------|
|          | 119410     | 119420     | 119430     | 119440     | 119450     | 119460     | 119470     | 119480     | 119490     | 119500     |
| BAC52    | .... ....  | .... ....  | .... ....  | .... ....  | .... ....  | .... ....  | .... ....  | .... ....  | .... ....  | .... ....  |
| BAC52-2b | TGCCTGAAAA | AAAAATCACA | GTAGAAATAT | CCCCTGAAAA | GGATTGATCA | TCGTTTTCGA | AATATTACCG | GAGGTAGCTG | GAAATTTGTT | GATAAATATT |

  

|          |            |            |            |            |            |            |            |            |            |            |
|----------|------------|------------|------------|------------|------------|------------|------------|------------|------------|------------|
|          | 119510     | 119520     | 119530     | 119540     | 119550     | 119560     | 119570     | 119580     | 119590     | 119600     |
| BAC52    | .... ....  | .... ....  | .... ....  | .... ....  | .... ....  | .... ....  | .... ....  | .... ....  | .... ....  | .... ....  |
| BAC52-2b | CCATGCCACA | TGTGTAGTTT | AATATTAGCC | TACCCAATTT | CGTTTATGTG | TGCACTAAAA | AGTCATTTGT | CAGCATTTTC | AGACATTCTG | ATTAAATTTT |

  

|          |            |            |            |            |            |            |            |            |            |            |
|----------|------------|------------|------------|------------|------------|------------|------------|------------|------------|------------|
|          | 119610     | 119620     | 119630     | 119640     | 119650     | 119660     | 119670     | 119680     | 119690     | 119700     |
| BAC52    | .... ....  | .... ....  | .... ....  | .... ....  | .... ....  | .... ....  | .... ....  | .... ....  | .... ....  | .... ....  |
| BAC52-2b | TTGTAATTTT | GATGAATTCA | AACCTTACAC | TTCTGTACTA | AACAGGCGCG | TACGCAGGAT | TTTTTCAAGT | GGGGGGGGGG | GGGGGTTTAA | CATTTTTTAA |

Deletion 1, 3' end

  

|          |            |             |            |            |            |            |            |            |           |            |
|----------|------------|-------------|------------|------------|------------|------------|------------|------------|-----------|------------|
|          | 119710     | 119720      | 119730     | 119740     | 119750     | 119760     | 119770     | 119780     | 119790    | 119800     |
| BAC52    | .... ....  | .... ....   | .... ....  | .... ....  | .... ....  | .... ....  | .... ....  | .... ....  | .... .... | .... ....  |
| BAC52-2b | TCGGGCCGAA | AATTTTCGCAT | CGACTCAGCC | AGCCGCTGAA | TAAGCGGGGG | GGGGGGGGGG | GG--AAGAGG | ACACTTTTTC | TTTTCTTTT | TTGGTCTCGA |

|                 |            |            |             |            |            |             |            |            |            |             |
|-----------------|------------|------------|-------------|------------|------------|-------------|------------|------------|------------|-------------|
|                 | 119810     | 119820     | 119830      | 119840     | 119850     | 119860      | 119870     | 119880     | 119890     | 119900      |
| <b>BAC52</b>    | .... ....  | .... ....  | .... ....   | .... ....  | .... ....  | .... ....   | .... ....  | .... ....  | .... ....  | .... ....   |
| <b>BAC52-2b</b> | AATTTGAAAA | TTTGACATTT | TGCTCTGTTG  | GGGGGGGGGG | GG-TAAGGTC | GCCTTTTTTTA | GGTCAGCCAT | GGGAATAGTT | TTTTT-ATTA | TTATTTTTTTT |
|                 | 119910     | 119920     | 119930      | 119940     | 119950     | 119960      | 119970     | 119980     | 119990     | 120000      |
| <b>BAC52</b>    | .... ....  | .... ....  | .... ....   | .... ....  | .... ....  | .... ....   | .... ....  | .... ....  | .... ....  | .... ....   |
| <b>BAC52-2b</b> | TTT-ATTATT | CAAAAAACA  | AAAAACA AAA | CAAAACAAAG | GGGGGGGGGG | TTGTTTTTTTT | AGGGGGGTTT | ATACACATAA | AAATACCAA  | GGGGGGGGG-  |
|                 | 120010     | 120020     | 120030      | 120040     | 120050     | 120060      | 120070     | 120080     | 120090     | 120100      |
| <b>BAC52</b>    | .... ....  | .... ....  | .... ....   | .... ....  | .... ....  | .... ....   | .... ....  | .... ....  | .... ....  | .... ....   |
| <b>BAC52-2b</b> | TTAACCCCTA | AACACCCCC  | CCCCCCC--T  | GCGTACGCGC | CTGGTACTAC | ATACATATTA  | AACCTTTCTA | TGTAAATTTT | AGCCCATTTC | TTTCAAAACG  |
|                 | 120110     | 120120     | 120130      | 120140     | 120150     | 120160      | 120170     | 120180     | 120190     | 120200      |
| <b>BAC52</b>    | .... ....  | .... ....  | .... ....   | .... ....  | .... ....  | .... ....   | .... ....  | .... ....  | .... ....  | .... ....   |
| <b>BAC52-2b</b> | TAATCACATG | ACCAGTACTA | GATTTATTTT  | GAAACATCCG | TCTTGATGTT | TATAATGATA  | GATGACGTTA | TACGACCCTG | TCTTATGGGG | TACCTTGTC   |
|                 | 120210     | 120220     | 120230      | 120240     | 120250     | 120260      | 120270     | 120280     | 120290     | 120300      |
| <b>BAC52</b>    | .... ....  | .... ....  | .... ....   | .... ....  | .... ....  | .... ....   | .... ....  | .... ....  | .... ....  | .... ....   |
| <b>BAC52-2b</b> | TTCGTGCCAT | TTTGGGGGGA | GGGTGGAGAC  | CCGCAGACTT | CCCCCTCTAG | AACCACTACT  | GAATACCACT | GAACGCAACT | GAAGAATATG | TTATCGTCAT  |
|                 | 120310     | 120320     | 120330      | 120340     | 120350     | 120360      | 120370     | 120380     | 120390     | 120400      |
| <b>BAC52</b>    | .... ....  | .... ....  | .... ....   | .... ....  | .... ....  | .... ....   | .... ....  | .... ....  | .... ....  | .... ....   |
| <b>BAC52-2b</b> | AGAGGTCGGT | TATACATTTT | TTTCCATGCA  | GGTTTTCATT | CACTGTGAGG | TGCTCATTTG  | TAATGATAAT | GACCCATCGT | CTCGGTGTTC | CCAGGGATGT  |
|                 | 120410     | 120420     | 120430      | 120440     | 120450     | 120460      | 120470     | 120480     | 120490     | 120500      |
| <b>BAC52</b>    | .... ....  | .... ....  | .... ....   | .... ....  | .... ....  | .... ....   | .... ....  | .... ....  | .... ....  | .... ....   |
| <b>BAC52-2b</b> | AAGTCTAGAT | TCAGACGTGG | TAGCCGTCAC  | ACCCGTGGAG | CAAGCTCCAC | TCCTCATCTA  | ATCTCTAATG | GACCTCTTTC | AACTGCCAC  | ACTATGCATG  |
|                 | 120510     | 120520     | 120530      | 120540     | 120550     | 120560      | 120570     | 120580     | 120590     | 120600      |
| <b>BAC52</b>    | .... ....  | .... ....  | .... ....   | .... ....  | .... ....  | .... ....   | .... ....  | .... ....  | .... ....  | .... ....   |
| <b>BAC52-2b</b> | CCGCAGAAGC | ACACAACCT  | GGTAATTACC  | TTTTTAAAGA | ACACAACACT | TAACCTTTAAA | GGTGTCGTGT | TTGTCTAGTG | AAAACGTCGT | TGGACTGTGG  |

## Reference

1. Oren M, Barela Hudgell MA, D' Allura B, Agronin J, Gross A, Podini D, et al. Short tandem repeats, segmental duplications, gene deletion, and genomic instability in a rapidly diversified immune gene family. BMC Genomics. 2016;17:900.
